# Supplementary material for: Impact of oil type on the development and oral bioavailability of self-nanoemulsifying drug delivery systems containing simvastatin
Source: PubMed Central journal article supplement (PMC11439918; doi:10.1038/s41598-024-71980-5), 2024-09-29
Supplement: 41598_2024_71980_MOESM1_ESM.pdf [file 41598_2024_71980_MOESM1_ESM.pdf]

**Title:**

**Impact of oil type on the development and oral bioavailability of self-nanoemulsifying drug delivery systems containing simvastatin**

**Authors:**

Aya Hamdy<sup>1\*</sup>, Mahmoud El-Badry<sup>2</sup>, M. Fathy<sup>2</sup>, Ahmed M. El-Sayed<sup>2</sup>

**Affiliations:**

<sup>1</sup>Assistant lecturer, Department of Pharmaceutics, Faculty of Pharmacy, Assiut University, Assiut, 71526, Egypt.

<sup>2</sup>Emeritus Professor, Department of Pharmaceutics, Faculty of Pharmacy, Assiut University, Assiut, 71526, Egypt.

**Emails:**

[elbadry@aun.edu.eg](mailto:elbadry@aun.edu.eg)

[mohamed.ibrahim9@pharm.aun.edu.eg](mailto:mohamed.ibrahim9@pharm.aun.edu.eg)

[ahmed.mostafa70020@yahoo.com](mailto:ahmed.mostafa70020@yahoo.com)

**Author for correspondence:**

Aya Hamdy, Department of Pharmaceutics, Faculty of Pharmacy, Assiut University, Assiut, 71526, Egypt.

**E-mail:**

[ayatallahhamdy@pharm.aun.edu.eg](mailto:ayatallahhamdy@pharm.aun.edu.eg)

[aya.hamdy31@yahoo.com](mailto:aya.hamdy31@yahoo.com)

**Telephone:** +201124739283

**Address:** Egypt, Assiut, El fath, 71785.

**Supplementary Table S1.** Percentage transmittance of selected SNEDDS formulations.

| <b>Formulation</b> | <b>% Transmittance</b> | <b>Formulation</b> | <b>% Transmittance</b> |
|--------------------|------------------------|--------------------|------------------------|
| Cin 3              | 100.46 ± 0.84          | EO5                | 97.43 ± 1.23           |
| Cin 8              | 100.31 ± 0.96          | EO6                | 98.71 ± 0.8            |
| Cin 9              | 100.77 ± 0.82          | EO7                | 99.16 ± 0.57           |
| Cin 12             | 101.78 ± 0.97          | EO15               | 98.48 ± 0.92           |
| Cin 13             | 101.7 ± 0.36           | EO16               | 100.39 ± 0.58          |
| Cin 14             | 101.39 ± 0.93          | EO23               | 98.41 ± 1.36           |
| Cin 17             | 100 ± 0.23             | EO24               | 99.31 ± 0.69           |
| Cin 18             | 99.85 ± 0.48           | EO32               | 98.55 ± 0.8            |
| Cin 21             | 99.85 ± 0.81           | EO39               | 99.08 ± 0.46           |
| Cin 22             | 99.46 ± 0.48           | EO40               | 99.69 ± 0.58           |
| Cl 3               | 100 ± 1.28             | EO44               | 96.98 ± 1.23           |
| Cl 4               | 100.16 ± 0.93          | Cl 10              | 100.23 ± 0.61          |
| Cl 7               | 99.77 ± 0.69           | Cl 11              | 99.77 ± 0.998          |
| Cl 8               | 99.85 ± 0.48           | Cl 14              | 99.93 ± 1.63           |
| Cl 9               | 99.7 ± 0.93            | Cl 15              | 100.24 ± 1.88          |

**Supplementary Table S2.** Composition and thermodynamic stability test results of selected SNEDDS formulations.

| <b>Name</b>   | <b>Oil (%)</b>       | <b>Surfactant (%)</b> | <b>Co-surfactant (%)</b> | <b>Centrifugation</b> | <b>Heating-cooling cycle</b> | <b>Freeze-thaw cycle</b> |
|---------------|----------------------|-----------------------|--------------------------|-----------------------|------------------------------|--------------------------|
| <b>Cin 3</b>  | 19.3<br>Cinnamon oil | 59.4<br>Tween 80      | 19.3<br>Labrasol         | Stable                | Stable                       | Stable                   |
| <b>Cin 8</b>  | 29.3<br>Cinnamon oil | 49.4<br>Tween 80      | 19.3<br>Labrasol         | Stable                | Stable                       | Stable                   |
| <b>Cin 9</b>  | 29.3<br>Cinnamon oil | 39.4<br>Tween 80      | 29.3<br>Labrasol         | Stable                | Stable                       | Stable                   |
| <b>Cin 12</b> | 39.3<br>Cinnamon oil | 49.4<br>Tween 80      | 9.3<br>Labrasol          | Stable                | Stable                       | Stable                   |
| <b>Cin 13</b> | 39.3<br>Cinnamon oil | 39.4<br>Tween 80      | 19.3<br>Labrasol         | Stable                | Stable                       | Stable                   |
| <b>Cin 14</b> | 39.3<br>Cinnamon oil | 29.4<br>Tween 80      | 29.3<br>Labrasol         | Stable                | Stable                       | Stable                   |
| <b>Cin 17</b> | 49.3<br>Cinnamon oil | 39.4<br>Tween 80      | 9.3<br>Labrasol          | Stable                | Stable                       | Stable                   |
| <b>Cin 18</b> | 49.3<br>Cinnamon oil | 29.4<br>Tween 80      | 19.3<br>Labrasol         | Stable                | Stable                       | Stable                   |
| <b>Cin 21</b> | 59.3<br>Cinnamon oil | 29.4<br>Tween 80      | 9.3<br>Labrasol          | Stable                | Stable                       | Stable                   |
| <b>Cin 22</b> | 59.3<br>Cinnamon oil | 19.4<br>Tween 80      | 19.3<br>Labrasol         | Stable                | Instable                     | Instable                 |
| <b>Cl 3</b>   | 24.3<br>Clove oil    | 54.4<br>Tween 80      | 19.3<br>Transcutol-P     | Stable                | Stable                       | Stable                   |
| <b>Cl 4</b>   | 24.3<br>Clove oil    | 44.4<br>Tween 80      | 29.3<br>Transcutol-P     | Stable                | Stable                       | Stable                   |
| <b>Cl 7</b>   | 34.3<br>Clove oil    | 54.4<br>Tween 80      | 9.3<br>Transcutol-P      | Stable                | Stable                       | Stable                   |
| <b>Cl 8</b>   | 34.3<br>Clove oil    | 44.4<br>Tween 80      | 19.3<br>Transcutol-P     | Stable                | Stable                       | Stable                   |
| <b>Cl 9</b>   | 34.3<br>Clove oil    | 34.4<br>Tween 80      | 29.3<br>Transcutol-P     | Stable                | Stable                       | Stable                   |
| <b>Cl 10</b>  | 44.3<br>Clove oil    | 44.4<br>Tween 80      | 9.3<br>Transcutol-P      | Stable                | Stable                       | Stable                   |

| <b>Name</b>  | <b>Oil (%)</b>       | <b>Surfactant (%)</b> | <b>Co-surfactant (%)</b> | <b>Centrifugation</b> | <b>Heating-cooling cycle</b> | <b>Freeze-thaw cycle</b> |
|--------------|----------------------|-----------------------|--------------------------|-----------------------|------------------------------|--------------------------|
| <b>CI 11</b> | 44.3<br>Clove oil    | 34.4<br>Tween 80      | 19.3<br>Transcutol-P     | Stable                | Stable                       | Stable                   |
| <b>CI 14</b> | 54.3<br>Clove oil    | 34.4<br>Tween 80      | 9.3<br>Transcutol-P      | Stable                | Stable                       | Stable                   |
| <b>CI 15</b> | 54.3<br>Clove oil    | 24.4<br>Tween 80      | 19.3<br>Transcutol-P     | Stable                | Stable                       | Stable                   |
| <b>EO5</b>   | 9.3<br>Ethyl oleate  | 49.4<br>Tween 80      | 39.3<br>Propylene glycol | Stable                | Stable                       | Stable                   |
| <b>EO6</b>   | 9.3<br>Ethyl oleate  | 44.4<br>Tween 80      | 44.4<br>Propylene glycol | Stable                | Stable                       | Stable                   |
| <b>EO7</b>   | 9.3<br>Ethyl oleate  | 39.4<br>Tween 80      | 49.3<br>Propylene glycol | Stable                | Stable                       | Stable                   |
| <b>EO15</b>  | 14.3<br>Ethyl oleate | 44.4<br>Tween 80      | 39.3<br>Propylene glycol | Stable                | Stable                       | Stable                   |
| <b>EO16</b>  | 14.3<br>Ethyl oleate | 34.4<br>Tween 80      | 49.3<br>Propylene glycol | Stable                | Stable                       | Stable                   |
| <b>EO23</b>  | 19.3<br>Ethyl oleate | 39.4<br>Tween 80      | 39.3<br>Propylene glycol | Stable                | Stable                       | Stable                   |
| <b>EO24</b>  | 19.3<br>Ethyl oleate | 29.4<br>Tween 80      | 49.3<br>Propylene glycol | Stable                | Stable                       | Stable                   |
| <b>EO32</b>  | 24.3<br>Ethyl oleate | 34.4<br>Tween 80      | 39.3<br>Propylene glycol | Stable                | Stable                       | Stable                   |
| <b>EO39</b>  | 29.3<br>Ethyl oleate | 34.4<br>Tween 80      | 34.3<br>Propylene glycol | Instable              | Instable                     | Instable                 |
| <b>EO40</b>  | 29.3<br>Ethyl oleate | 29.4<br>Tween 80      | 39.3<br>Propylene glycol | Stable                | Stable                       | Stable                   |
| <b>EO44</b>  | 34.3<br>Ethyl oleate | 34.4<br>Tween 80      | 29.3<br>Propylene glycol | Instable              | Instable                     | Instable                 |
